# Supplementary material
Source: Springer Nature journal article supplement (https://www.springermedizin.de/resource/supplementary/12877_2009_160_MOESM3_ESM.pdf/9441298)

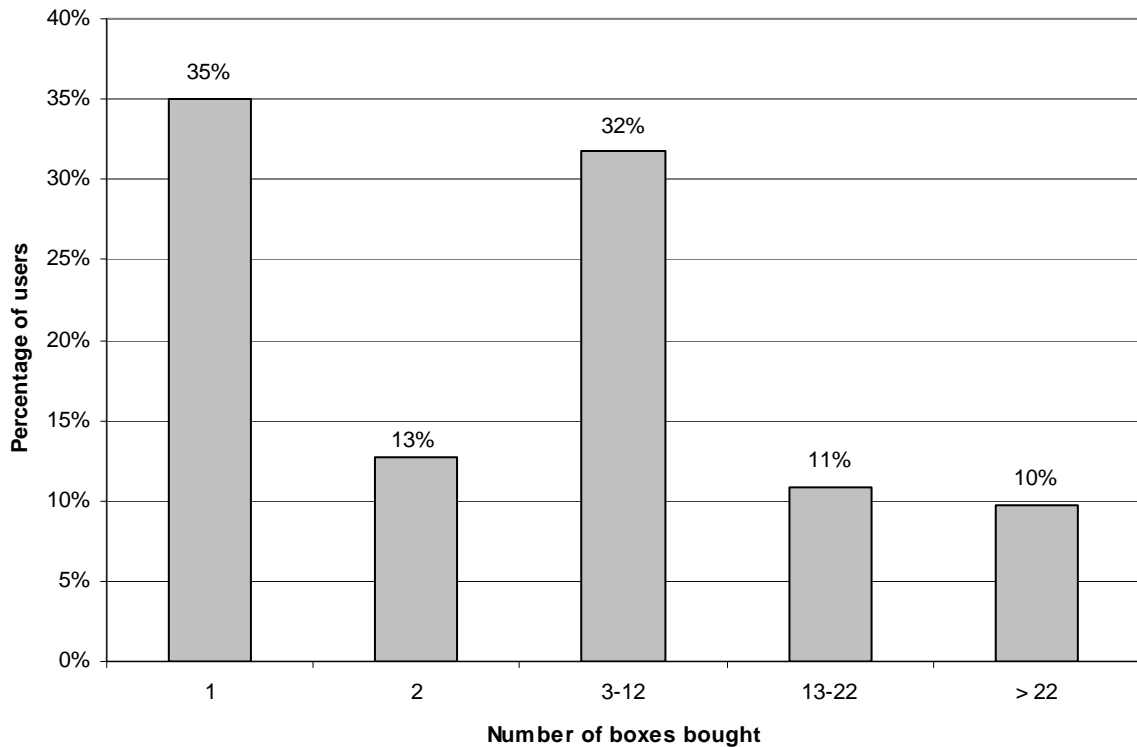

Supplement: MOESM3 [file 9441298]
